# Supplementary material
Source: publisher figshare collection journal article supplement (https://acs.figshare.com/ndownloader/files/3712147)
Supplement: Supplementary file 1 [file 3712147]

## Supporting Information

# Photochemistry of Dissolved Black Carbon Released from Biochar: Reactive Oxygen Species Generation and Phototransformation

*Heyun Fu<sup>†</sup>, Huiting Liu<sup>†</sup>, Jingdong Mao<sup>‡</sup>, Wenyong Chu<sup>‡</sup>, Qilin Li<sup>§</sup>, Pedro J.J. Alvarez*

*<sup>§</sup>, Xiaolei Qu<sup>†\*</sup>, Dongqiang Zhu<sup>†</sup>*

<sup>†</sup>State Key Laboratory of Pollution Control and Resource Reuse, School of the  
Environment, Nanjing University, Jiangsu 210023, China

<sup>‡</sup>Department of Chemistry and Biochemistry, Old Dominion University, 4541  
Hampton Boulevard, Norfolk, Virginia 23529, United States

<sup>§</sup>Department of Civil and Environmental Engineering, Rice University, Houston TX  
77005, United States

\* Corresponding author Xiaolei Qu, phone: +86-8968-0256; email:

xiaoleiqu@nju.edu.cn

This SI includes a total of 10 pages (including this page) with 11 figures and 2 table.

## Calculation of the steady-state concentration and apparent quantum yield of singlet oxygen

The degradation rate of furfuryl alcohol (FFA) can be expressed as:

$$-\frac{d[FFA]}{dt} = k_{FFA} [^1O_2] [FFA] \quad (1)$$

$$-\frac{d[FFA]}{dt} = k_{FFA} [^1O_2]_{ss} [FFA] = k_{ex} [FFA] \quad (2)$$

where  $k_{ex}$  is the experimentally determined pseudo-first order rate constant of FFA degradation.

Steady state  $^1O_2$  concentration can be determined as:

$$[^1O_2]_{ss} = \frac{k_{ex}}{k_{FFA}} \quad (3)$$

Where  $k_{FFA} = 1.2 \times 10^8 \text{ M}^{-1} \text{ s}^{-1}$ .

The  $^1O_2$  production rate ( $R_p$ ) can be determined as:

$$R_p = [^1O_2]_{ss} \times k_d \quad (4)$$

Where  $k_d = 2.4 \times 10^7 \text{ s}^{-1}$  which represents the quenching of  $^1O_2$  by water.<sup>2</sup>

The rate of light absorption,  $R_a$ , can be determined as:

$$R_a = \sum_{\lambda} \left( E_{p,\lambda}^0 \left( 1 - 10^{-\frac{A_{\lambda} z}{l}} \right) / z \right) \quad (5)$$

Where  $E_{p,\lambda}^0$  is the spectra photon irradiance ( $\text{meinsteins cm}^{-2} \text{ s}^{-1}$ ) at the solution

surface as determined by a spectrometer USB2000+ (Ocean Optics, FL, USA),  $\lambda$  is

the wavelength (nm),  $z$  is the depth of the solution (cm),  $A_{\lambda}$  is the absorbance of

solution measured by the UV-vis spectrometer. And  $l(\text{cm})$  is the optical path length of

the cuvette used in the UV-vis measurement.  $R_a$  was integrated from 290 to 400 nm.<sup>2</sup>

The apparent quantum yield of  $^1\text{O}_2$  can be determined as:

$$\Phi_{\text{singlet oxygen}} = R_p/R_a \quad (6)$$

### **Comparison of $k_{ex}$ among altered dissolved BC.**

The UV-vis absorption spectra of altered dissolved BC such as demineralized and photobleached dissolved BC were different from the original sample, leading to different photon absorption during photoreactions. In order to take account of changes in photon absorption, their pseudo-first-order FFA degradation rate constants were normalized by the photon absorption ratio,  $R_a/R_{a, \text{original dissolved BC}}$ .  $R_a$  was calculated using equation 5. The normalized pseudo-first-order FFA degradation rate constants were used in the comparison of photoactivity which isolated the role of changes in chemistry, rather than changes in light absorption.

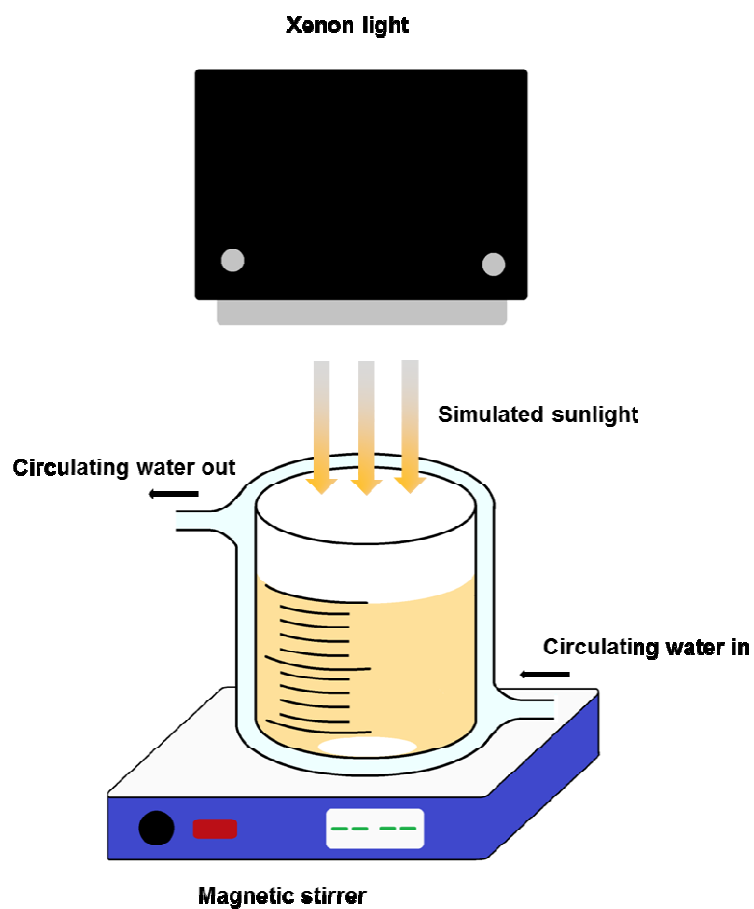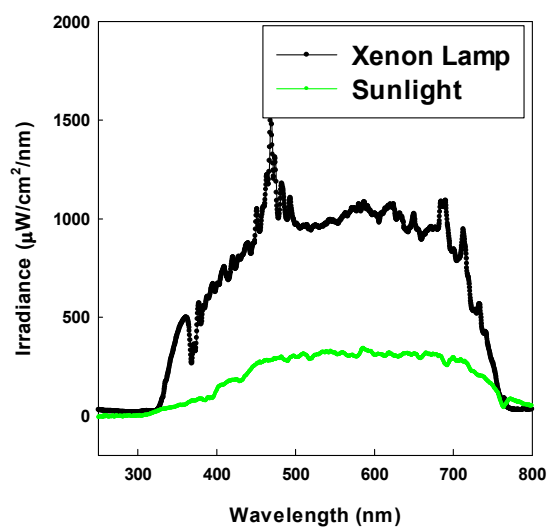

Figure S1. (a) Experimental setup for the irradiation experiments, and (b) the spectra of the xenon lamp and sunlight (on the campus of Nanjing University, 3 pm, 11/27/2015) measured using a spectrometer USB2000+.

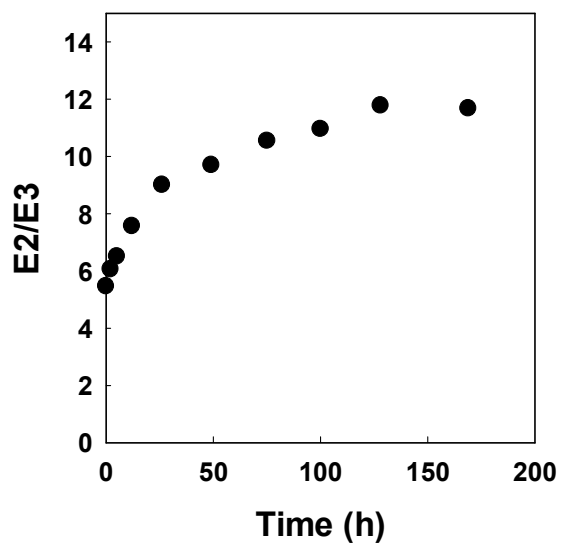

Figure S2. E2/E3 ratio (i.e., the absorbance at 254 nm divided by that at 365 nm) of dissolved BC as a function of irradiation time.

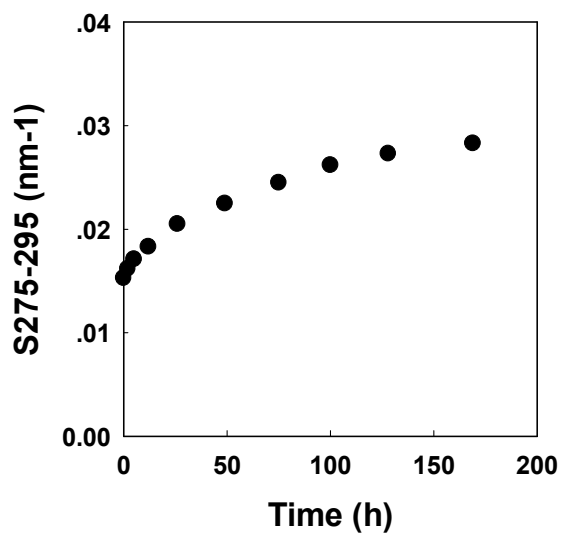

Figure S3. Spectral slopes calculated for the range of 275-295 nm of dissolved BC as a function of irradiation time.

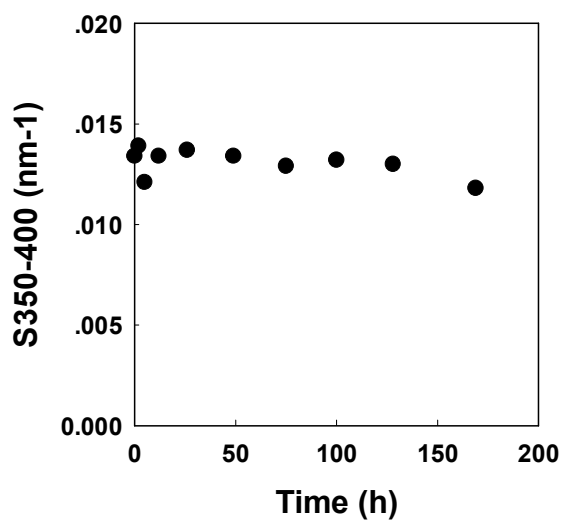

Figure S4. Spectral slopes calculated for the range of 350-400 nm of dissolved BC as a function of irradiation time.

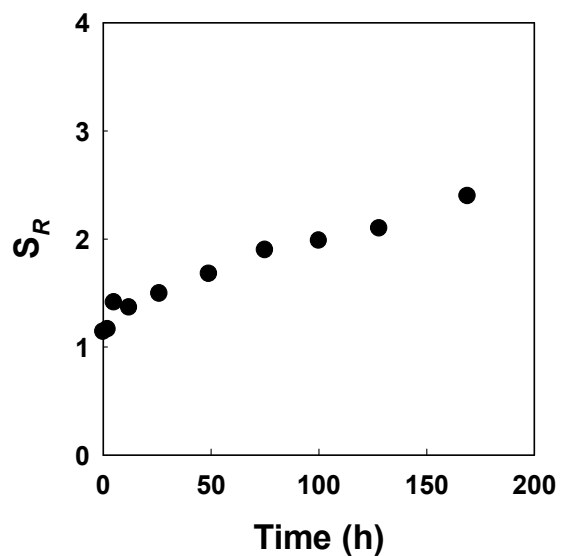

Figure S5. Slope ratio ( $S_R$ ) of 100 mg/L dissolved BC as a function of irradiation time.

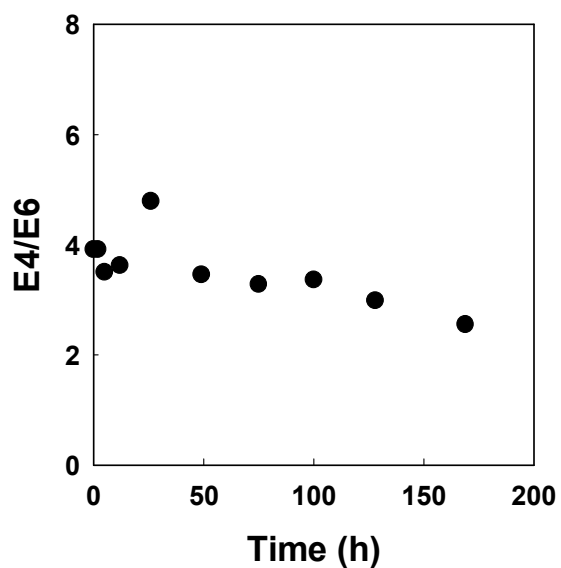

Figure S6. E4/E6 ratio (i.e., the absorbance at 465 nm divided by that at 665 nm) of dissolved BC as a function of irradiation time.

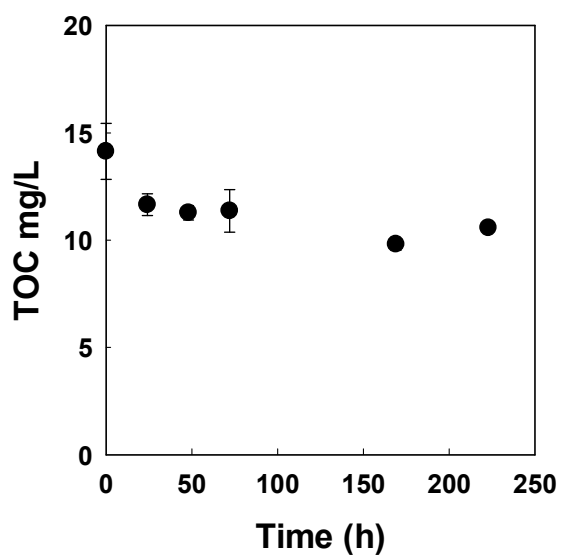

Figure S7. Photo-mineralization of dissolved BC under simulated sunlight as measured by TOC. Error bars represent  $\pm$  one standard deviation from the average of triplicates.

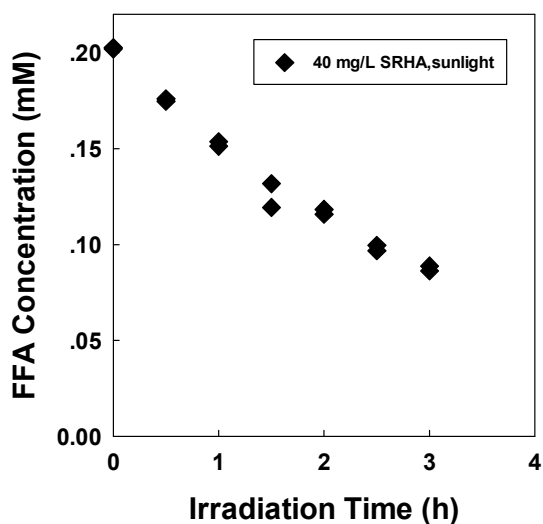

Figure S8. FFA loss, representing  $^1\text{O}_2$  generation as a function of irradiation time with 40 mg/L (20.8 mg C/L) Suwannee River humic acid (SRHA).

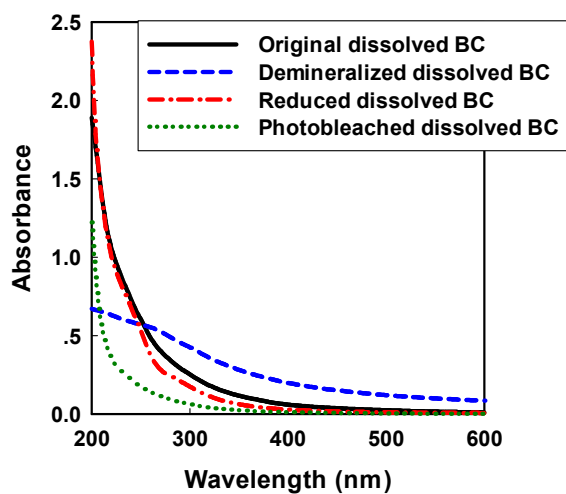

Figure S9. UV-vis absorbance spectra of 100 mg/L original dissolved BC,  $\text{NaBH}_4$ -treated dissolved BC (reduced dissolved BC), and 24h-photobleached dissolved BC; and the UV-vis absorbance spectrum of 30 mg/L demineralized dissolved BC. Spectra was measured in a 1 cm path length quartz cell.



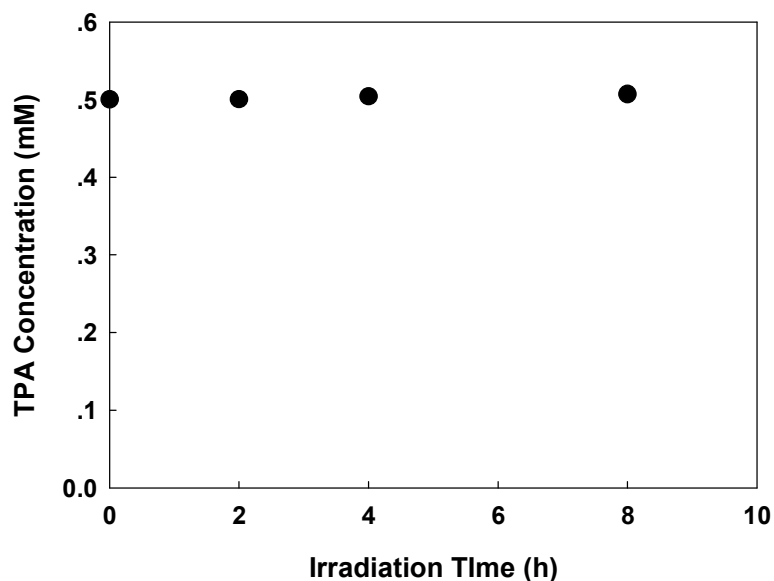

Figure S10. TPA loss, representing  $\bullet\text{OH}$  generation, as a function of irradiation time with 100 mg/L dissolved BC under simulated sunlight.

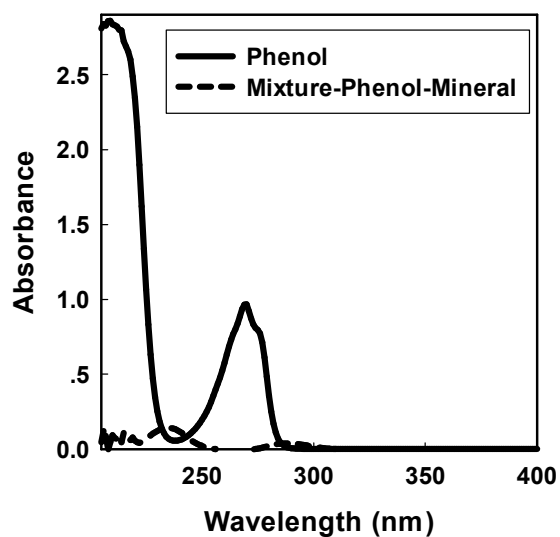

Figure S11. UV-vis spectrum of 60 mg/L phenol and the spectrum of the mixture of 60 mg/L phenol and 50 mg/L minerals subtracted by the spectra of 60 mg/L phenol and 50 mg/L minerals. Spectra was measured in a 1 cm path length quartz cell.

Table S1. Experimental conditions for photochemical experiments.

| Photochemical Experiments                 |                    | DBC Concentration (mg/L) | ROS Probe/ Scavenger | Probe/ Scavenger Concentration | Solution Volume (mL) |
|-------------------------------------------|--------------------|--------------------------|----------------------|--------------------------------|----------------------|
| DBC Phototransformation                   |                    | 100                      | /                    | /                              | 100                  |
| ROS Production                            | $^1\text{O}_2$     | 100                      | FFA                  | 0.2 mM                         | 100                  |
|                                           | $\text{O}_2^-$     | 100                      | XTT                  | 0.05 mM                        | 100                  |
|                                           | $\bullet\text{OH}$ | 100                      | TPA                  | 0.5 mM                         | 100                  |
| Effect of DBC Structure on ROS Production | original DBC       | 100                      | FFA, XTT             | 0.2, 0.05 mM                   | 20                   |
|                                           | reduced DBC        | 100                      | FFA, XTT             | 0.2, 0.05 mM                   | 100                  |
|                                           | photobleached DBC  | 100                      | FFA, XTT             | 0.2, 0.05 mM                   | 20                   |
|                                           | demineralized DBC  | 30                       | FFA, XTT             | 0.2, 0.05 mM                   | 20                   |
|                                           | minerals           | 50                       | FFA, XTT             | 0.2, 0.05 mM                   | 20                   |
| Role of ROS in DBC Phototransformation    | control            | 100                      | /                    | /                              | 20                   |
|                                           | $^1\text{O}_2$     | 100                      | $\text{NaN}_3$       | 10 mM                          | 20                   |
|                                           | $^1\text{O}_2$     | 100                      | $\text{D}_2\text{O}$ | 90 % (v:v)                     | 20                   |
|                                           | $\text{O}_2^-$     | 100                      | SOD                  | 5 mg/L                         | 20                   |

Table S2. Composition of the minerals in dissolved BC as determined by the X-ray fluorescence spectrometer.

| Formula | K <sub>2</sub> O | SiO <sub>2</sub> | SO <sub>3</sub> | Cl  | Na <sub>2</sub> O | CaO | MgO | P <sub>2</sub> O <sub>5</sub> | Rb <sub>2</sub> O |
|---------|------------------|------------------|-----------------|-----|-------------------|-----|-----|-------------------------------|-------------------|
| wt%     | 60.6             | 20.8             | 12.5            | 3.0 | 1.4               | 1.1 | 0.3 | 0.2                           | 0.1               |

## Reference

- (1) Haag, W. R.; Hoigne, J.; Gassman, E.; Braun, A. M., Singlet oxygen in surface waters .1. Furfuryl alcohol as a trapping agent. *Chemosphere* **1984**, *13*, 631-640.
- (2) Dalrymple, R. M.; Carfagno, A. K.; Sharpless, C. M., Correlations between dissolved organic matter optical properties and quantum yields of singlet oxygen and hydrogen peroxide. *Environ. Sci. Technol.* **2010**, *44*, 5824-5829.
